# Supplementary material for: Orbital symmetries of charge density wave order in YBa2Cu3O6+x
Source: PubMed Central journal article supplement — Sci Adv. 2020 Nov 6;6(45):eaay0345. doi: 10.1126/sciadv.aay0345 (PMC7673704; doi:10.1126/sciadv.aay0345), 2020-11-06
Supplement: aay0345_SM.pdf [file aay0345_SM.pdf]

[advances.sciencemag.org/cgi/content/full/6/45/eaay0345/DC1](https://advances.sciencemag.org/cgi/content/full/6/45/eaay0345/DC1)

## Supplementary Materials for

### Orbital symmetries of charge density wave order in $\text{YBa}_2\text{Cu}_3\text{O}_{6+x}$

Christopher McMahon, A. J. Achkar, E. H. da Silva Neto, I. Djianto, J. Menard, F. He, R. Sutarto, R. Comin, Ruixing Liang, D. A. Bonn, W. N. Hardy, A. Damascelli, D. G. Hawthorn\*

\*Corresponding author. Email: [dhawthor@uwaterloo.ca](mailto:dhawthor@uwaterloo.ca)

Published 6 November 2020, *Sci. Adv.* **6**, eaay0345 (2020)  
DOI: 10.1126/sciadv.aay0345

#### **This PDF file includes:**

Supplementary Text  
Figs. S1 to S3

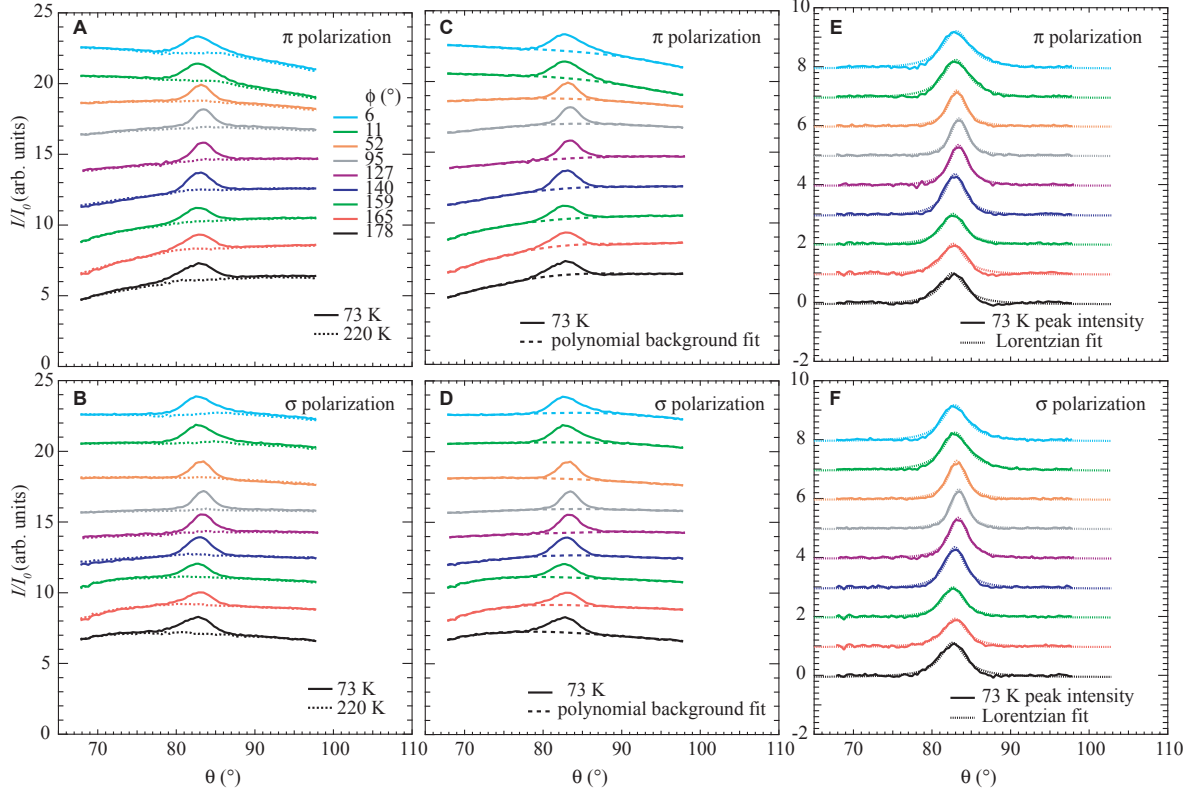

Figure S1: **Example of the measurement and extraction of peak intensities.**  $\theta$  scans at various  $\phi$  values through the CDW peak in the  $\text{YBa}_2\text{Cu}_3\text{O}_{6.75}$  sample at  $(0.31 \ 0 \ 1.48)$  for A)  $\pi$  and B)  $\sigma$  incident photon polarization. For clarity, data at different  $\phi$  values are offset in the y-axis increments of 2 (Measurements at  $\phi = 178^\circ$  are not offset. C) and D) fits to the fluorescent background of the data at 73 K using a 5th order polynomial. E) and F) The peak intensity for various  $\phi$  values after subtraction of a polynomial background along with Lorentzian fits to the peaks.

## Assessment of the quality of fits and range of parameters that agree with the measurements.

For the  $(0 \ 0.31 \ 0 \ L)$  peak, the measured ratio  $I_\sigma/I_\pi$  was fit to a model with;

$$\hat{F}(\vec{Q}, \hbar\omega) \sim \begin{bmatrix} F_{aa} & 0 & 0 \\ 0 & F_{bb} & 0 \\ 0 & 0 & F_{cc} \end{bmatrix} \quad (\text{S1})$$

The best fit to the data was achieved with  $F_{bb}/F_{aa} = 0.998 \pm 0.020$  and  $F_{cc}/F_{aa} = 0.049 \pm 0.041$ . The standard deviation, however, does not adequately represent the uncertainty

in the parameters. This is because  $F_{bb}/F_{aa}$  and  $F_{cc}/F_{aa}$  are not completely independent fitting parameters. Rather, variation in one parameter can be offset with variation in the other in order to improve the fit. A better assessment of the range of parameters that provide good agreement with the data can be achieved by examining the dependence on fit parameters of the reduced  $\chi^2$  statistic, as shown in Figure S2 A). Good fits to the data are found in an elliptical range of parameters around the best fit value, where  $F_{aa} \simeq F_{bb} \ll F_{cc}$  with a level of agreement comparable to the scatter in the data are roughly found for range of parameters inside the  $\chi_0^2 = 5$  contour. A comparison between the measurement and model calculations with selected parameters (shown by the solid circles in fig. S2 A) that have different values of  $\chi_0^2$  is shown in Fig. S2 B and C.

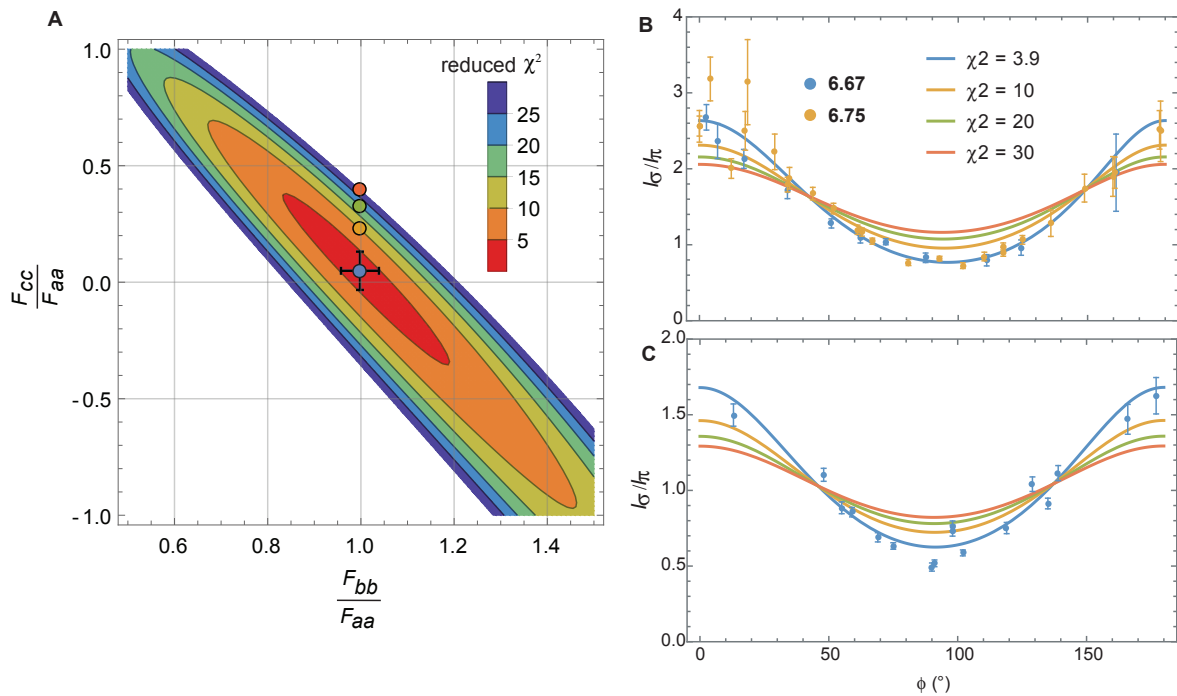

Figure S2: **Assessment of the fit quality for the (0 0.31 L) peak.** **A** A map of the reduced  $\chi^2$  from fits to data at both (0.31 0 1.48) and (0.31 0 1.32) vs.  $F_{cc}/F_{aa}$ , and  $F_{bb}/F_{aa}$ . The blue circle represents the best fit value. **B** and **C** Examples of  $I_\sigma/I_\pi$  vs.  $\phi$  calculated for different reduced  $\chi^2$  values. The curves in **B** and **C** were calculated using parameters given by the point in **A** of the same colour as the curve.

For the (0.31 0 0  $L$ ) peak, the measured ratio  $I_\sigma/I_\pi$  was fit to a more a general model with off-diagonal terms  $F_{ac} = F_{ca}$ , indicative of broken  $bc$  and  $ab$  plane mirror symmetries:

$$\hat{F}(\vec{Q}, \hbar\omega) \sim \begin{bmatrix} F_{aa} & 0 & F_{ac} \\ 0 & F_{bb} & 0 \\ F_{ac} & 0 & F_{cc} \end{bmatrix} \quad (\text{S2})$$

The best fit to the data on the 6.75 sample gave  $F_{ac}/F_{bb} = -0.073$ ,  $F_{cc}/F_{bb} = 0.183$ , and  $F_{aa}/F_{bb} = 1.172$ . In figure S3 we present the variation of reduced  $\chi^2$  statistic with model parameters. As shown, a range of model parameters provide good agreement with the data with fits with reduced  $\chi^2 < 10$  all provide similar quality, comparable to the scattering in the data. This region with  $\chi^2 < 10$  includes models with  $F_{ac} = 0$  and  $F_{aa}/F_{bb}$  significantly greater than 1, models that retain  $ab$  and  $bc$  plane mirror symmetries but has significant in-plane asymmetry. However, it also includes a model with  $F_{aa} \simeq F_{bb}$  and  $F_{ac} = -0.22$ , a model that breaks  $ab$  and  $bc$  plane mirror symmetries but retains approximate in-plane asymmetry of the diagonal elements, similar to the (0 0.31  $L$ ) peak.

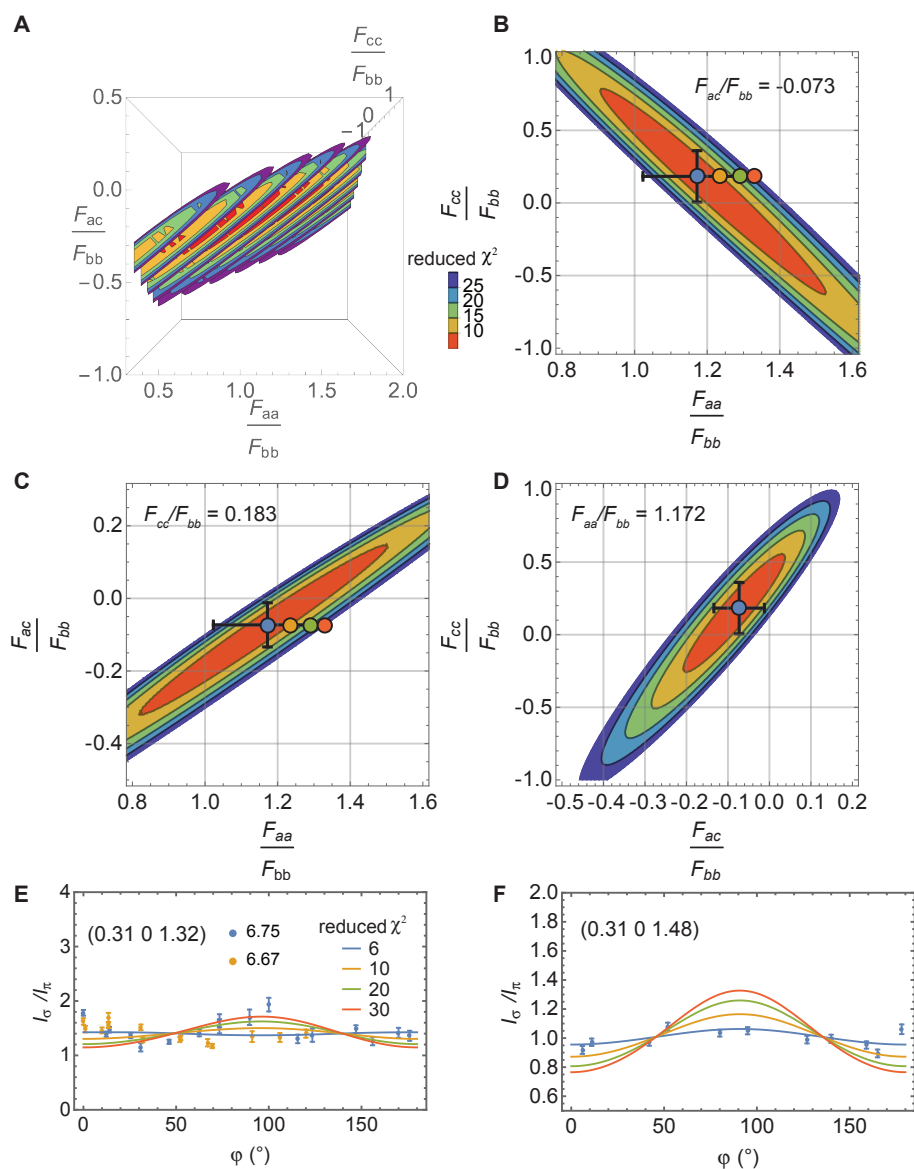

Figure S3: **Assessment of the fit quality for the (0.31 0 L) peak.** **A** A map of the reduced  $\chi^2$  from fits to the 6.75 data at both (0.31 0 1.48) and (0.31 0 1.32) vs.  $F_{ac}/F_{bb}$ ,  $F_{cc}/F_{bb}$ , and  $F_{aa}/F_{bb}$ . Contours of constant  $\chi^2$  are shown as slices through the 3D parameter space. **B**, **C** and **D** 2D slices of reduced- $\chi^2$  through the best fit value  $F_{ac}/F_{bb} = -0.073$ ,  $F_{cc}/F_{bb} = 0.183$ , and  $F_{aa}/F_{bb} = 1.172$ . The blue circle represents the best fit value and the error bars denote the 95% confidence interval of the fit. **E** and **F** Examples of  $I_\sigma/I_\pi$  vs.  $\phi$  calculated for different reduced  $\chi^2$  values. The curves in **E** and **F** were calculated using parameters given by the point in **C** and **D** of the same colour as the curve.
